# Supplementary material for: Highly efficient and stable solid-state Li–O2 batteries using a perovskite solid electrolyte
Source: Royal Society of Chemistry journal article supplement (doi:10.1039/c8ta10771h), 2019-01-01
Supplement: c8ta10771h1.pdf [file c8ta10771h1.pdf]

## Supplementary Materials for

# Highly efficient and stable solid-state Li-O<sub>2</sub> batteries using a perovskite solid electrolyte

*Hang T. T. Le,<sup>a,b</sup> Duc Tung Ngo,<sup>a</sup> Pravin N. Didwal,<sup>a</sup> John G. Fisher,<sup>a</sup> Choong-Nyeon Park,<sup>a</sup>*

*Il-Doo Kim,<sup>c</sup> and Chan-Jin Park<sup>a,\*</sup>*

<sup>a</sup> Department of Materials Science and Engineering, Chonnam National University, 77 Yongbong-ro, Buk-gu, Gwangju 61186, South Korea

<sup>b</sup> School of Chemical Engineering, Hanoi University of Science and Technology, 1 Dai Co Viet, Hai Ba Trung, Hanoi 10000, Vietnam

<sup>c</sup> Department of Materials Science and Engineering, Korea Advanced Institute of Science and Technology (KAIST), 291 Daehak-ro, Yuseong-gu, Daejeon 34141, South Korea

\* Corresponding author.

Tel.: +82-62-530-1704; Fax: +82-62-530-1699.

E-mail address: parkcj@jnu.ac.kr ([C.J. Park](mailto:parkcj@jnu.ac.kr))

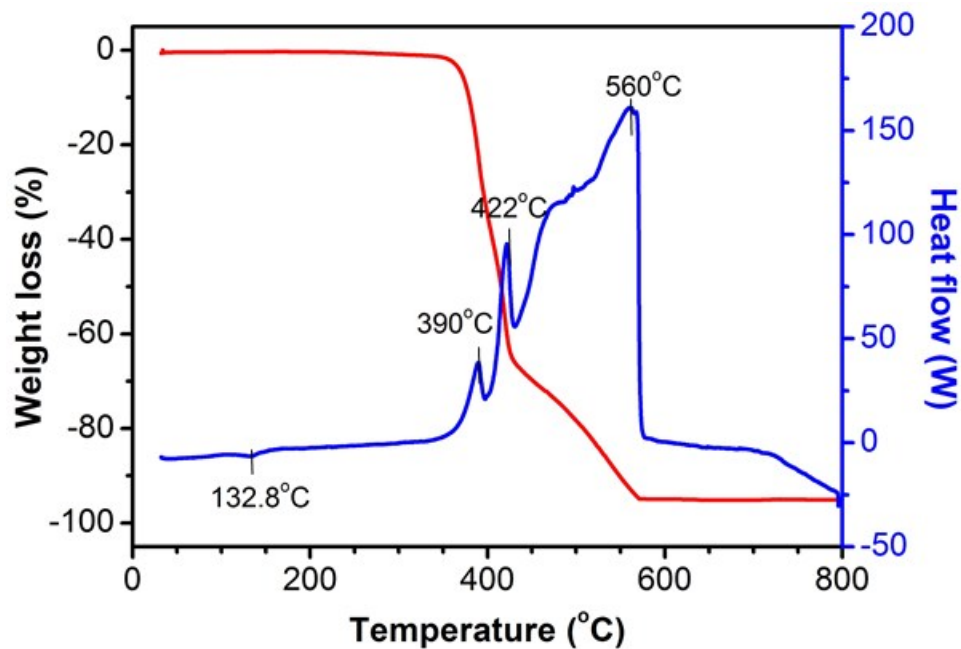

**Fig. S1.** Thermogravimetric (TG) and differential scanning calorimetry (DSC) plots of the CGPE.

As shown in **Fig. S1**, the composite gel polymer electrolyte (CGPE) remained in the solid state up to a temperature of 133 °C. Then, the CGPE was liquidised and thermally stable up to 350 °C before decomposing. Therefore, 133 °C is regarded as the limiting temperature at which the designed Li-O<sub>2</sub> cell using CGPE as an interlayer between the Li metal and A-LLTO solid electrolyte remains in the solid state.

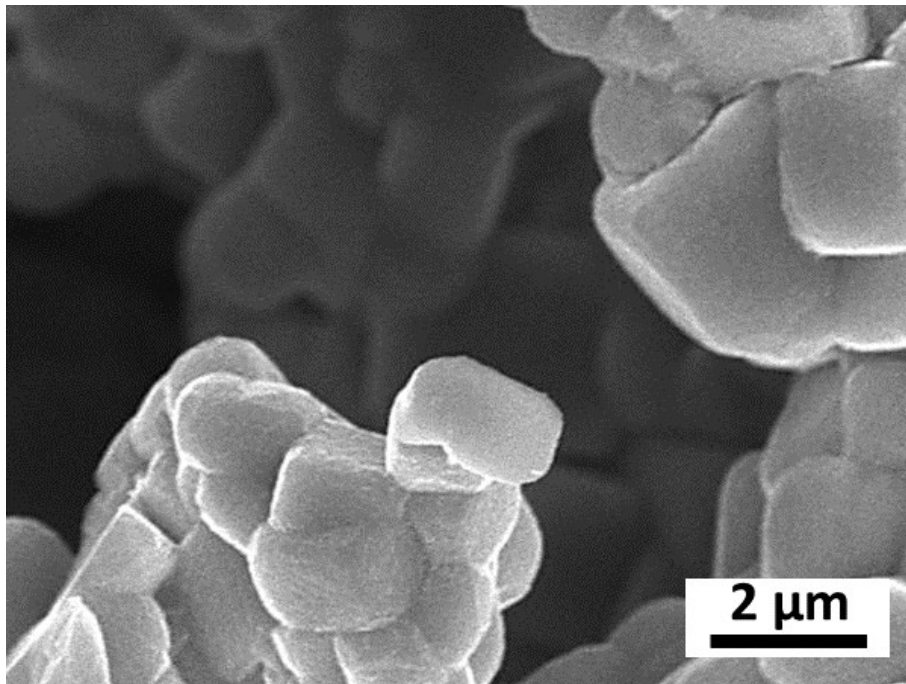

**Fig. S2.** SEM image of a typical pore in the porous cathode frame.

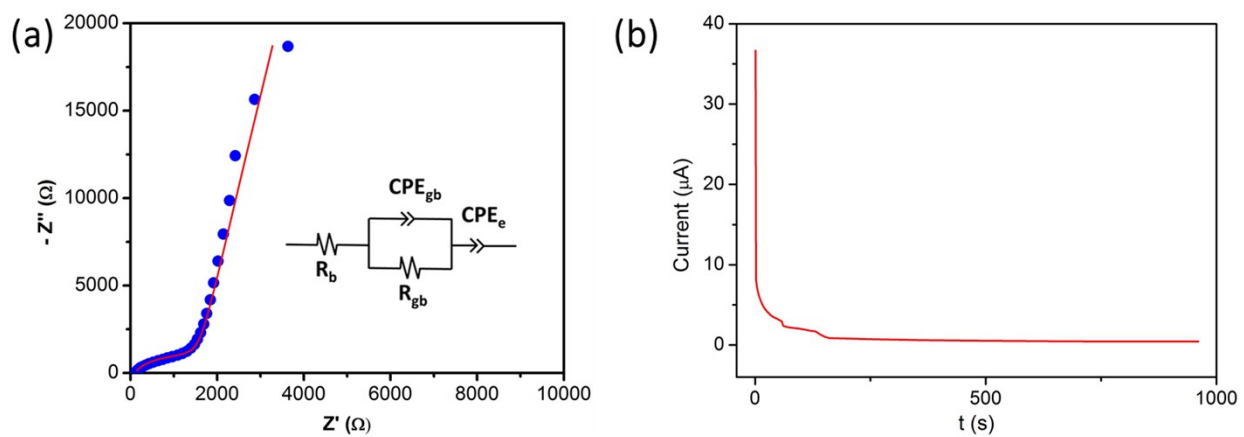

**Fig. S3.** (a) Electrochemical impedance spectrum measured at 25 °C and (b) direct current polarization curve under the applied voltage of 2 V for the integrated cathode without carbon layer and CoO catalyst. Inset in (a) is the equivalent circuit corresponding to impedance spectrum.

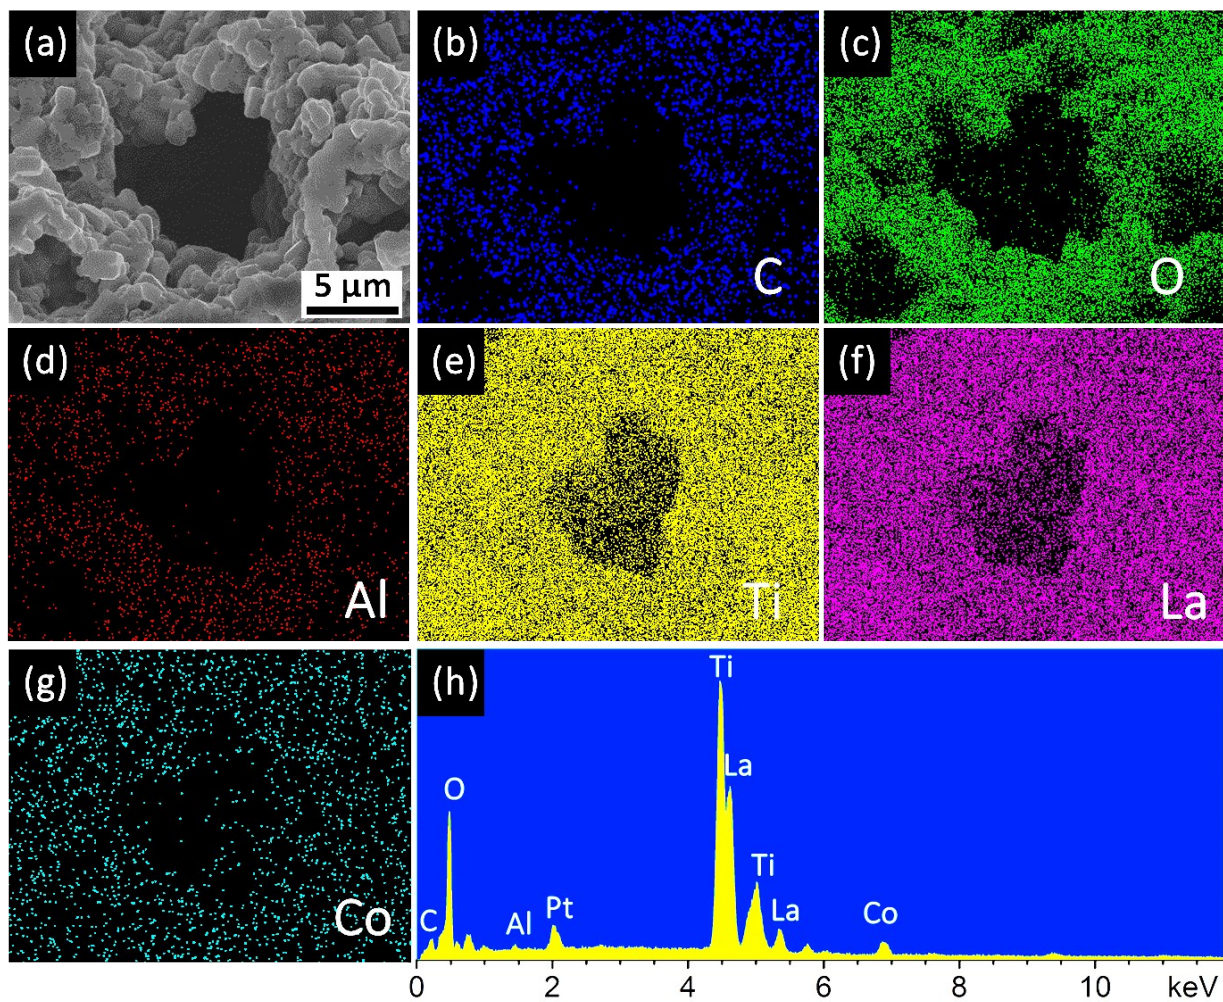

**Fig. S4.** a) SEM image of the porous cathode coated with carbon and CoO catalyst. b–g) Corresponding EDS elemental (C, O, Al, Ti, La, and Co) mapping images. h) EDS spectrum.

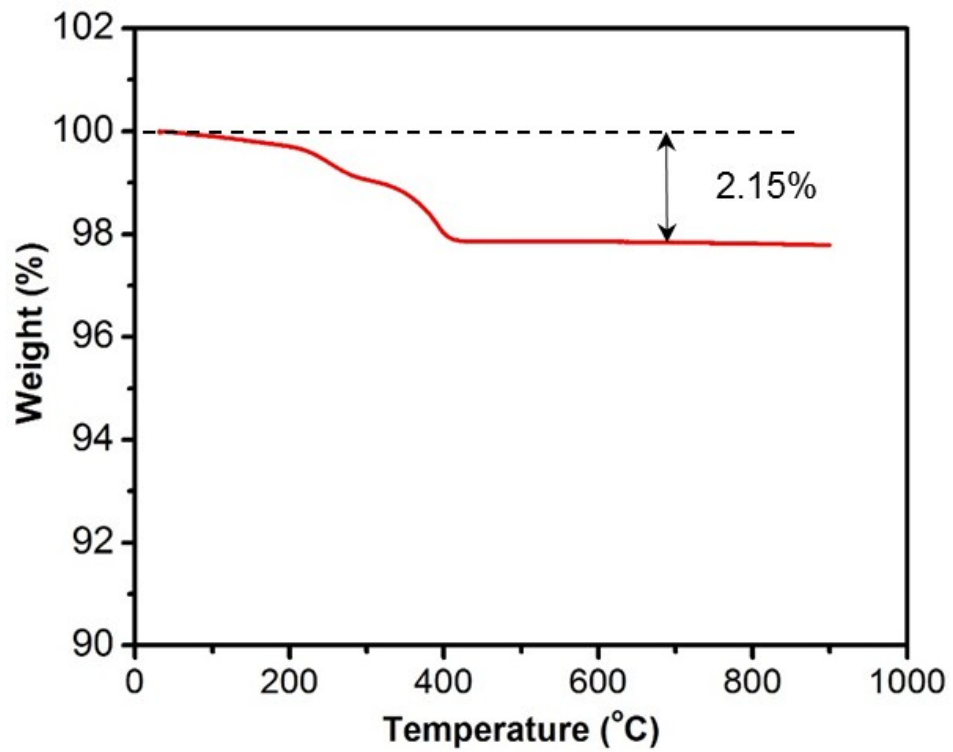

**Fig. S5.** Thermogravimetric analysis (TGA) of the porous cathode following carbon coating.

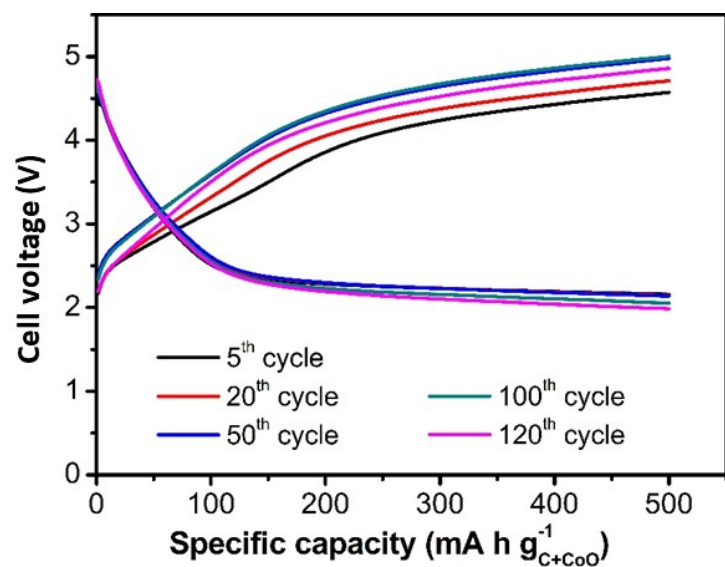

**Fig. S6.** Selected discharge-charge curves of of the solid-state Li-O<sub>2</sub> cell, operated at 50 °C in limited capacity mode of 500 mAh g<sup>-1</sup><sub>C+CoO</sub> at 0.3 mA cm<sup>-2</sup>.

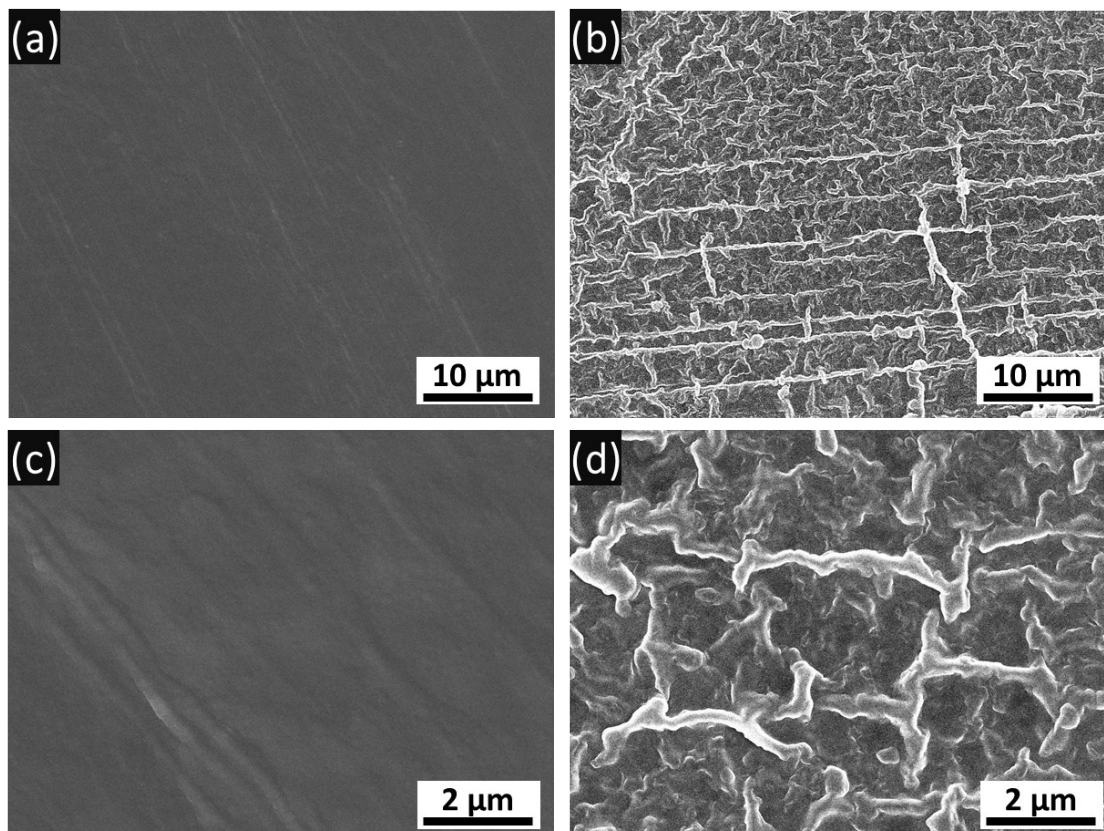

**Fig. S7.** Low and high-magnification SEM images of Li metal electrode (a,c) before and (b,c) after cycling test at the limited capacity mode of  $500 \text{ mAh g}^{-1}_{\text{C+C}_6\text{O}}$  under the current density of  $0.3 \text{ mA cm}^{-1}$  and the temperature of  $50 \text{ }^\circ\text{C}$ .
